# Supplementary material
Source: MDPI journal article supplement (https://www.mdpi.com/2225-1154/10/4/58)

# Kaibab Fire & Climate Adaptation Workshop

February 11 – 13, 2020

Elks Lodge, 2101 N San Francisco St, Flagstaff, AZ 86001, Flagstaff, Arizona

Through participation in the workshop, attendees will:

- Review regional and local effects of climate change on fire in forest ecosystems
- Explore resources and tools that can be used to integrate climate change into management
- Understand adaptation concepts and principles in the context of sustainable forest and fire management
- Identify challenges and opportunities for fire managers
- **Develop actionable steps to adapt forests to changing fire regimes**

## Agenda

### Day 1: Tuesday, February 11, 2020

12:30 **Registration**

1:00 **Welcome & Introductions**

1:30 **Flash Talk Presentations**

1. Southwest FireCLIME project background – Andi Thode & Martha Sample, Northern Arizona University
2. NIACS overview – Leslie Brandt & Courtney Peterson, Northern Institute of Applied Climate Science, USDA Forest Service
3. KPERP Overview & Presentation – Alex Spannuth, Kaibab National Forest & Kaibab NF Team

2:25 **Stretch Break**

2:35 **Climate FAQ Presentation** – Pete Fulé, Northern Arizona University

3:35 **Break**

3:50 **NIACS Adaptation Workshop Step 1: Define area of interest, program, goals and objectives, and timeframes**

- **Goals:** What are your desired outcomes? Broad, general statements, usually not quantifiable, that describe the desired outcomes.
- **Desired Future Conditions (DFCs):** A description of the land or resource conditions that are believed necessary to fully meet the *goals* and *objectives*
- **Objectives:** How do you plan to achieve these outcomes? A concise, time-specific statement of measurable planned results that correspond to pre-established *desired future conditions*.

5:00 **Adjourn for the Day**

### Day 2: Wednesday, February 12, 2020

8:30 **Overview for the day/what to expect**

8:45 **Recap and highlights from the Pre-Workshop Webinar** – Andi Thode, Northern Arizona University

9:15 **NIACS Adaptation Workbook Step 2: Assess Climate Change Impacts on the KPERP**

How might KPERP be uniquely impacted by climate change?

10:15 **Break**

10:30 **Adaptive Capacity**

The impacts of climate change are only half of the equation when determining vulnerability. We will also need to explore how adaptive capacity can contribute to vulnerability.

**11:00 Vulnerability Determination**

Vulnerability is a function of the impacts and adaptive capacity of your system. Take a moment to review the overall impacts on and adaptive capacity of the KPERP. Then, determine the overall vulnerability of KPERP implementation unit in your group.

**11:30 NIACS Adaptation Workbook Step 3: Challenges/Opportunities for Meeting Management Objectives**

Identify challenges and opportunities relevant to the KPERP plan objectives.

Evaluate whether it is feasible to achieve current management objectives and where it might be worth re-evaluating objectives based on climate change projections.

**12:00 Lunch (taco & salad bar)**

**1:15 Identifying Forest Adaptation Approaches and Tactics** – Courtney Peterson, Research Associate II, Colorado State University, NIACS

**1:30 Introduce the Fire Menu of Strategies & Approaches** – Martha Sample & Andi Thode, Northern Arizona University/Southwest FireCLIME

**1:45 NIACS Adaptation Workbook Step 4: Identifying Forest Adaptation Approaches and Tactics**

Select potential adaptation actions from the menu of Adaptation Strategies and Approaches and evaluate potential adaptation tactics.

**2:45 Break**

**3:00 Identifying Forest Adaptation Approaches and Tactics & Fire Menu Feedback – Large Group Discussion**

**4:00 NIACS Adaptation Workbook Step 5: Identifying Metrics for Monitoring and Evaluating Effectiveness**

Identify metrics to use to evaluate the effectiveness of adaptation actions.

**4:45 Next steps for tomorrow – Group Presentations!**

**5:00 Adjourn for the Day**

**Day 3: Thursday February 13, 2020**

**8:15 Arrive and Refreshments**

**8:30 Reflections from previous day**

**9:00 Telling Your Adaptation Story**

Work in your groups to create posters summarizing your climate change impacts to your KPERP implementation unit, the identified adaptation strategies and approaches for action, and a monitoring plan. Be prepared to give a 3-minute presentation and answer questions.

**10:00 Group Presentations on Climate Change Impacts and Adaptation Strategies**

Short, 3-min presentations from each group followed by questions.

**10:45 Moving Forward: How do we start?**

Group discussion on how to start moving adaptation ideas forward and feedback on Fire Adaptation Menu.

**11:30 Next Steps/Putting it All Together**

Discuss opportunities for coordination, learning, or shared resources.

**12:00 Evaluations & Wrap-up**

12:30 **Adjourn**

**Thank you for your participation!**

*This active, hands-on training is being organized by Southwest FireCLIME (NAU) and the Northern Institute of Applied Climate Science (NIACS) in partnership with the Kaibab National Forest.*

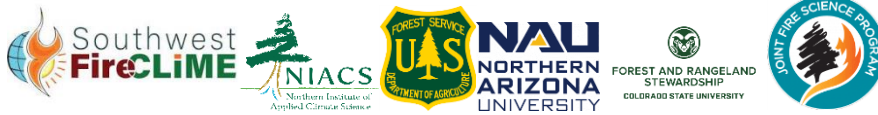

Supplement: s1 [file s1]
