# Supplementary material
Source: MDPI journal article supplement (https://www.mdpi.com/2225-1154/10/4/58)
Supplement: s1 [file s1]

Archive with 2 entries (2 files):
- Fire Menu Supplement S1.pdf
- Fire Menu Supplement S2.pdf
