# Supplementary material
Source: MDPI journal article supplement (https://www.mdpi.com/2225-1154/10/4/58)
Supplement: s1 [file s1]

## **Appendix B: Fire Menu Feedback Survey**

1. What did you like about the Fire Adaptation Menu?
  - a. Which ideas or concepts were described well?
  - b. Were there any you found particularly useful?
2. What could use improvement?
  - a. Are there terms/statements that were confusing or misleading?  
Please list your ideas.
3. Are there missing topics in the menu?
  - a. Were you expecting to find something that wasn't there?
4. In what situations do you think it would be most useful to use this menu?
5. Other notes?
